# Supplementary material for: Molecular Heterogeneity Analysis and Prognostic Stratification of Driver-Gene mutated NSCLC Based on Concurrent Alteration Profiles
Source: Research Square preprint supplement (doi:10.21203/rs.3.rs-8103198/v1), 2025-12-03
Supplement: Supplementary file 1 [file 0c0a1f706ab62c2dbc48329a.docx]

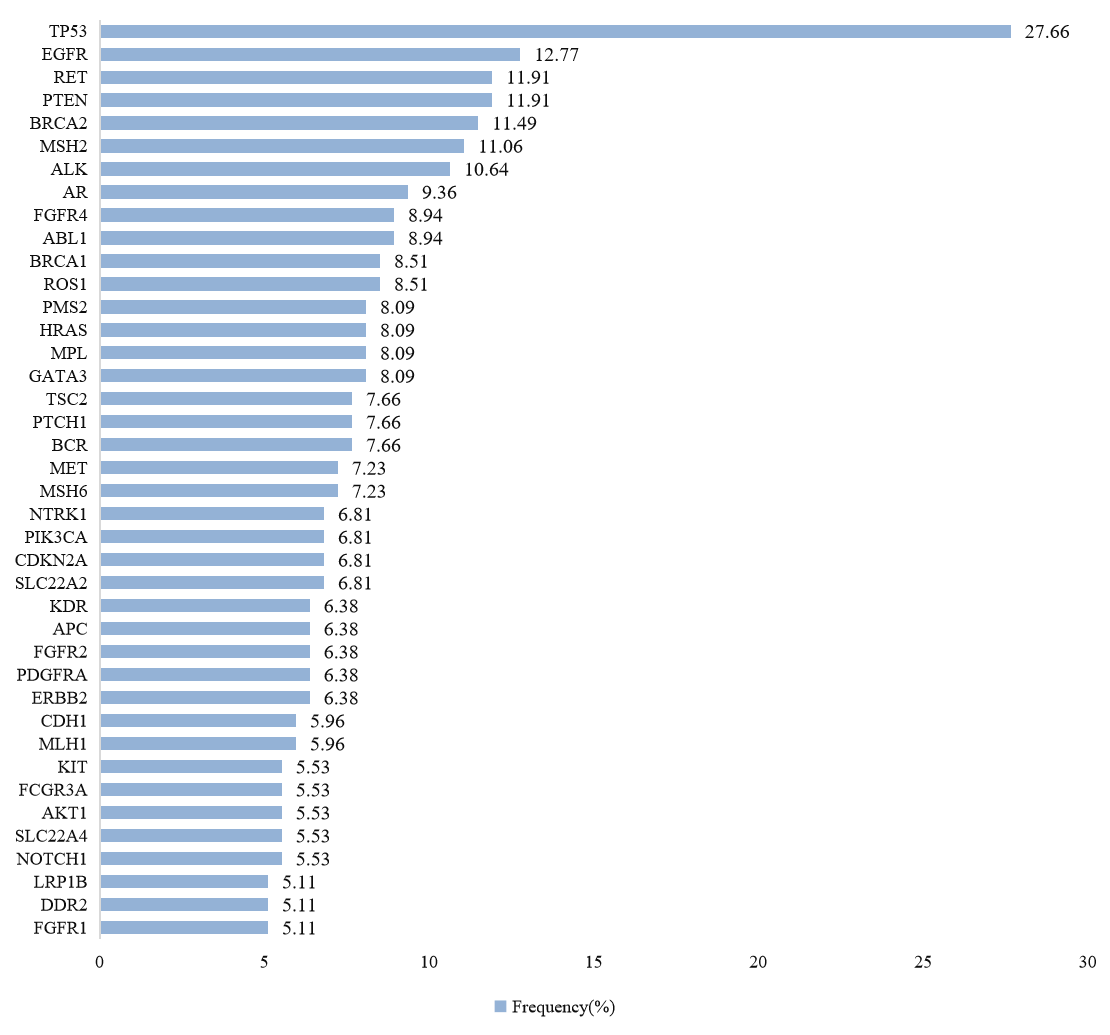


**Supplement Figure 1.** Histogram of high-frequency co-alterations in surgical patients with classical EGFR mutations.

**Supplement Table 1. Silhouette scores for different cluster numbers.**

| **Num of clusters** | **Silhouette score** |
| --- | --- |
| 2 | 0.472 |
| 3 | 0.490 |
| 4 | 0.505 |
| 5 | 0.498 |
